# Supplementary material for: Sodium and Magnesium Ion Location at the Backbone and at the Nucleobase of RNA: Ab Initio Molecular Dynamics in Water Solution
Source: PubMed Central journal article supplement — ACS Omega. 2022 Jun 23;7(27):23234–44. doi: 10.1021/acsomega.2c01327 (PMC9280761; doi:10.1021/acsomega.2c01327), 2022-06-23
Supplement: ao2c01327_si_001.pdf [file ao2c01327_si_001.pdf]

## Supporting information

### **Sodium and magnesium ion location at the backbone and at the nucleobase of RNA: ab initio molecular dynamics in water solution**

Stefan K. Kolev<sup>1\*</sup>, Petko St. Petkov<sup>2</sup>, Teodor I. Milenov<sup>1</sup>, Georgi N. Vayssilov<sup>2</sup>

<sup>1</sup> *Institute of Electronics, Bulgarian Academy of Sciences, 72 Tzarigradsko Chaussee Blvd., 1784 Sofia, Bulgaria*

<sup>2</sup> *Faculty of Chemistry and Pharmacy, University of Sofia, Boulevard James Bouchier 1, 1126 Sofia, Bulgaria*

Supporting information contains Tables S1 and S2 and Figures S1-S11.

Table S1. Average number (n) of oxygen atoms from the first coordination shell of Na<sup>+</sup> or Mg<sup>2+</sup> ions and percentage of time spent by the ion with different numbers n of coordinated oxygen atoms. Empty cells indicate that no time was spent in the given configuration.

| ssRNA | Cation                     | n±SD      | n = 3 | n = 4 | n = 5 | n = 6 | n = 7 | n = 8 |
|-------|----------------------------|-----------|-------|-------|-------|-------|-------|-------|
| CC    | Na <sup>+</sup> 1 bound    | 4.9 ± 0.7 | 0.02  | 27.76 | 55.14 | 16.67 | 0.40  | 0.01  |
|       | Na <sup>+</sup> 2 bound    | 5.2 ± 0.7 | 0.19  | 13.14 | 54.25 | 31.25 | 1.06  | 0.11  |
| CC    | Na <sup>+</sup> 1 solvated | 5.4 ± 0.6 |       | 3.32  | 55.27 | 40.69 | 0.71  | 0.01  |
|       | Na <sup>+</sup> 2 solvated | 5.6 ± 0.6 |       | 4.08  | 32.86 | 58.39 | 4.54  | 0.13  |
| GC    | Na <sup>+</sup> 1 bound    | 4.7 ± 0.5 | 0.48  | 32.58 | 63.70 | 3.18  | 0.06  |       |
|       | Na <sup>+</sup> 2 bound    | 5.4 ± 0.6 | 0.13  | 4.13  | 51.60 | 41.90 | 2.24  |       |
| CC    | Mg <sup>2+</sup> bound     | 6.0 ± 0.1 |       |       | 0.72  | 99.28 |       |       |
| CC    | Mg <sup>2+</sup> solvated  | 6.0 ± 0.0 |       |       |       | 100   |       |       |
| GC    | Mg <sup>2+</sup> bound     | 6.0 ± 0.0 |       |       | 0.13  | 99.87 |       |       |

Table S2. Percentage of time spent by the RNA backbone in gg, gt, tg or tt conformation. Empty cells indicate that no time was spent in the given conformation.

| ssRNA | Cations                    | gg     | gt    | tg    | tt |
|-------|----------------------------|--------|-------|-------|----|
| CC    | 2 Na <sup>+</sup> bound    | 99.981 |       | 0.019 |    |
| CC    | 2 Na <sup>+</sup> solvated | 97.719 |       | 2.281 |    |
| GC    | 2 Na <sup>+</sup> bound    | 92.929 |       | 7.071 |    |
| CC    | Mg <sup>2+</sup> bound     | 99.970 |       | 0.030 |    |
| CC    | Mg <sup>2+</sup> solvated  | 99.924 |       | 0.076 |    |
| GC    | Mg <sup>2+</sup> bound     | 99.233 | 0.157 | 0.610 |    |

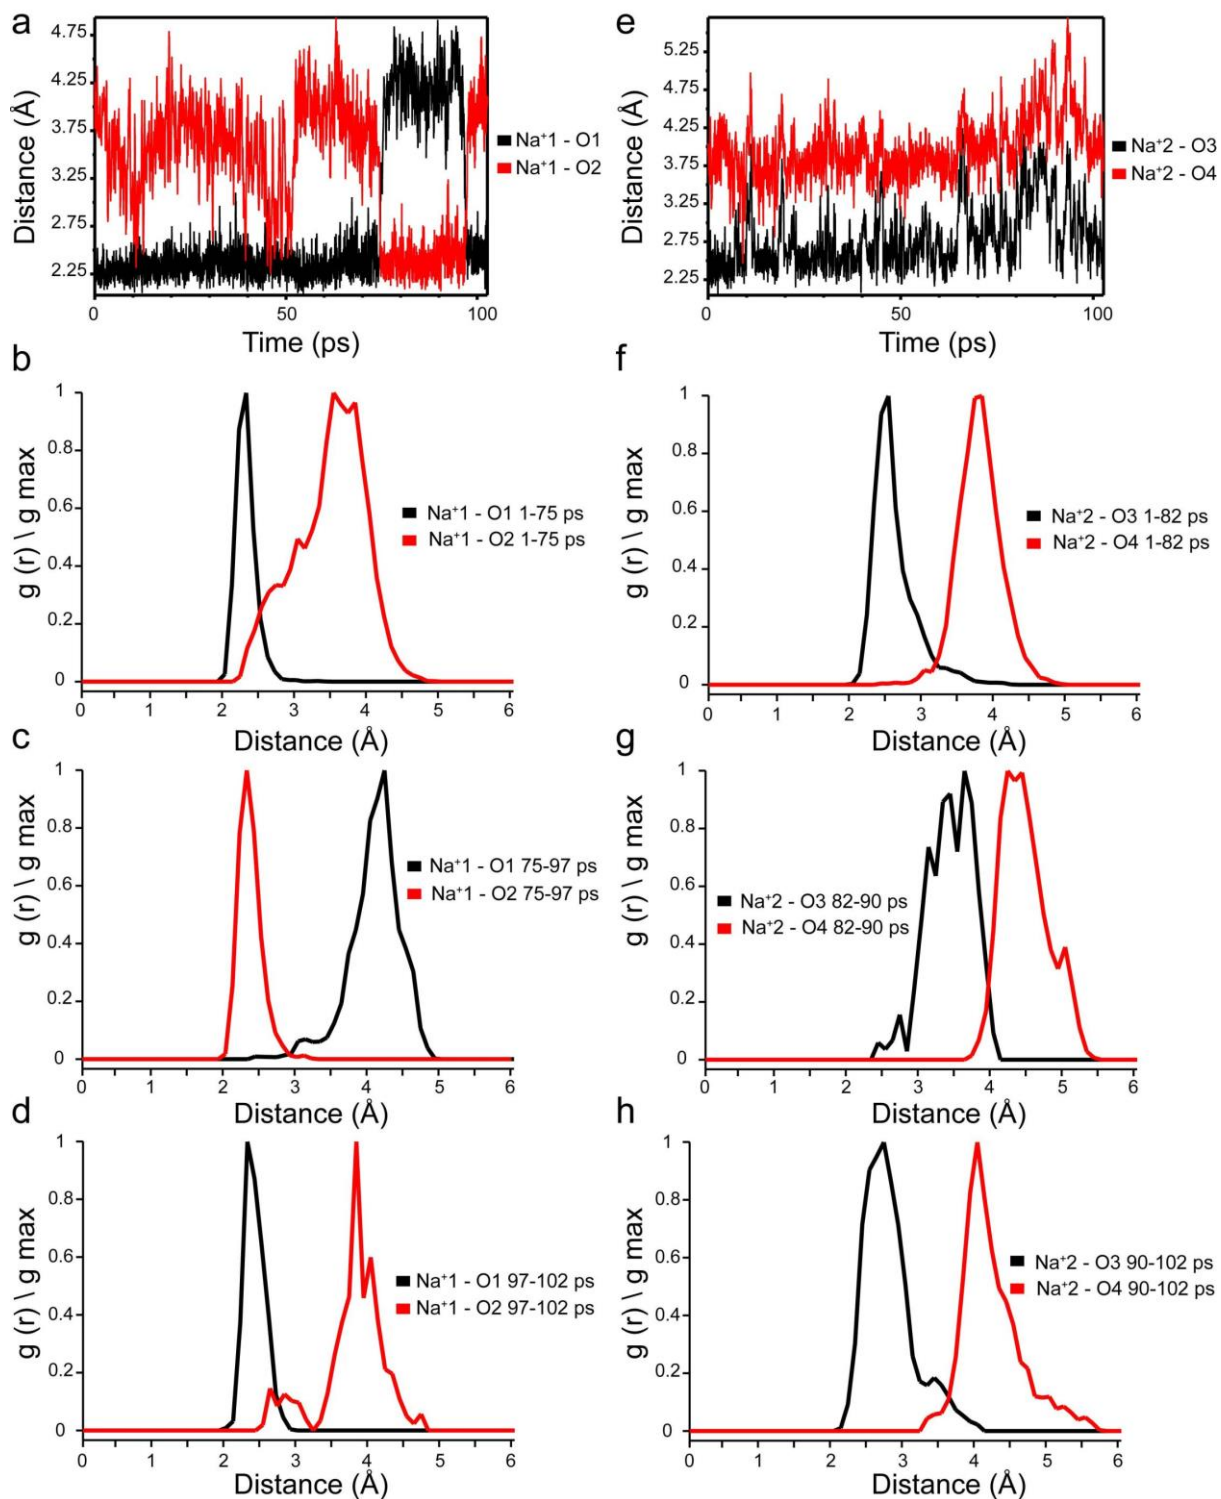

Figure S1. Dynamics of Na<sup>+</sup>1–O1 and Na<sup>+</sup>1–O2 distances from the ion to the O atom of the PO<sub>4</sub> group (a); Na<sup>+</sup>2–O3 and Na<sup>+</sup>2–O4 (e); RDFs for the corresponding distances Na<sup>+</sup>1–O1 and Na<sup>+</sup>1–O2 (b), (c) and (d); RDFs for the corresponding distances Na<sup>+</sup>2–O3 and Na<sup>+</sup>2–O4 (f), (g) and (h). All graphics are derived from the CC 2Na<sup>+</sup> simulation with two bound sodium ions.

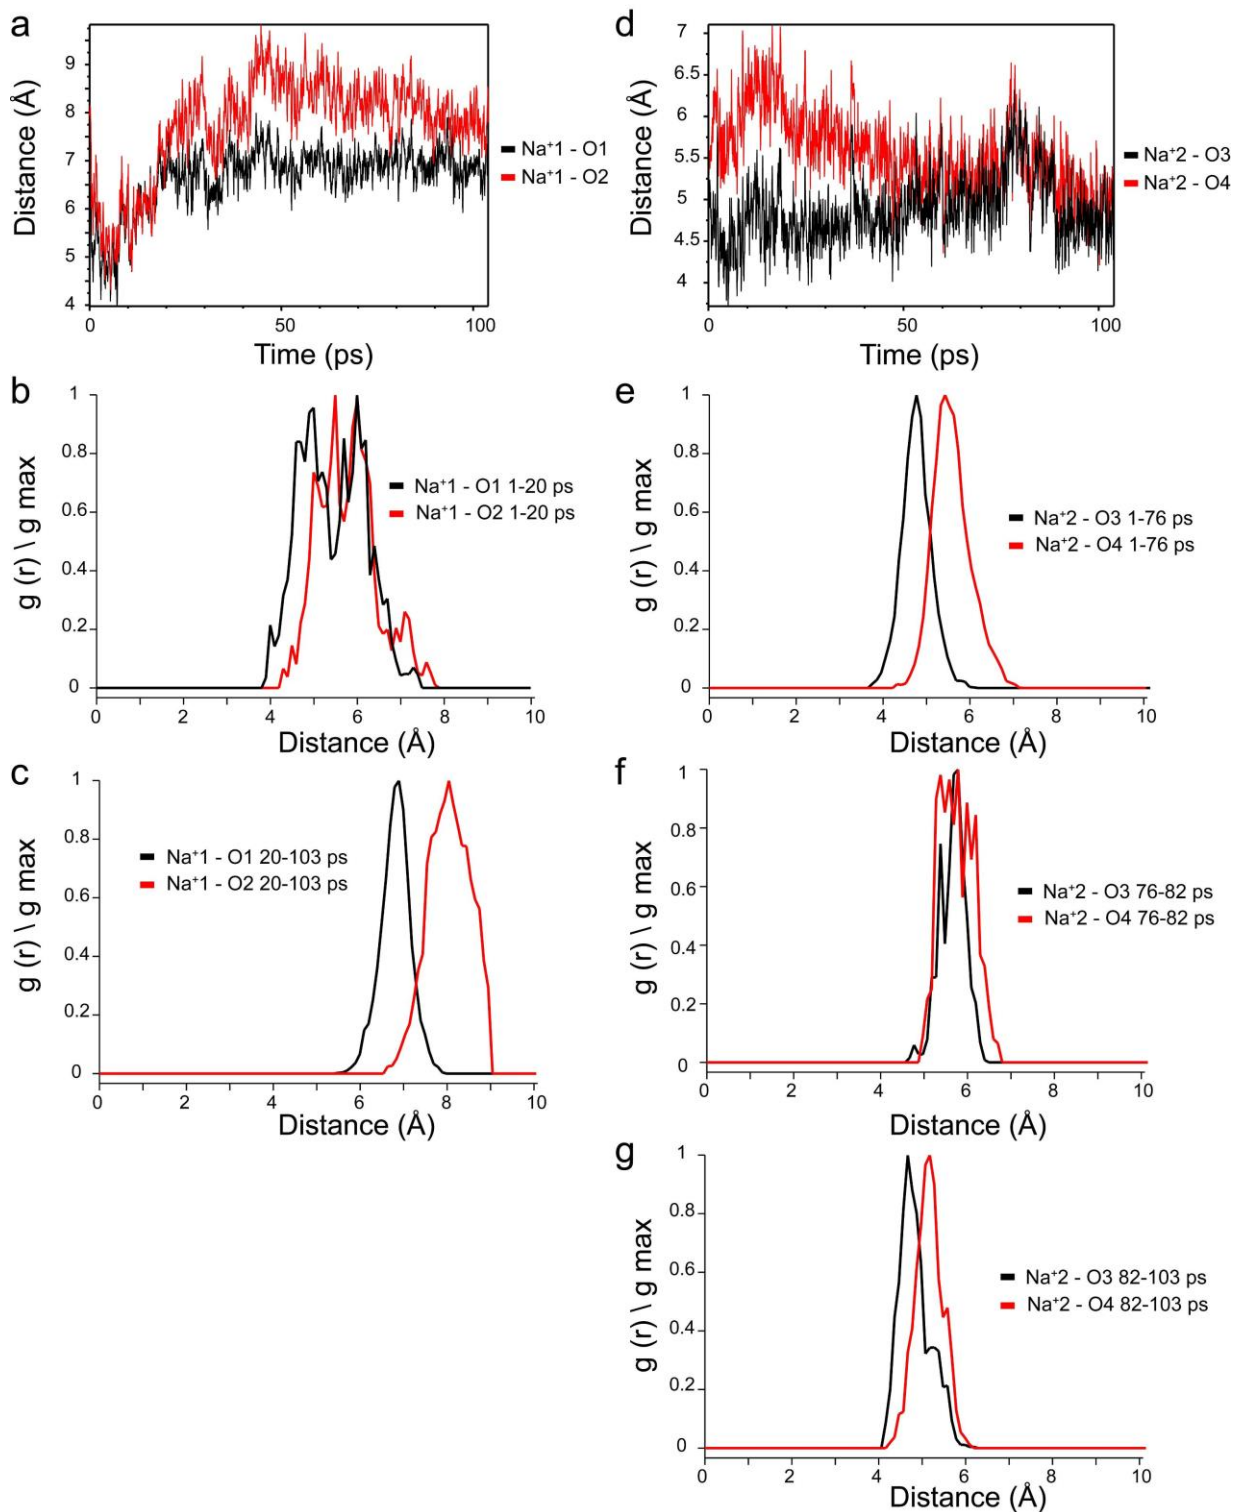

Figure S2: Dynamics of Na<sup>+</sup>1-O1 and Na<sup>+</sup>1-O2 distances from the ion to the O atom of the PO<sub>4</sub> group (a); Na<sup>+</sup>2-O3 and Na<sup>+</sup>2-O4 (d); RDFs for the corresponding distances Na<sup>+</sup>1-O1 and Na<sup>+</sup>1-O2 (b), (c); RDFs for the corresponding distances Na<sup>+</sup>2-O3 and Na<sup>+</sup>2-O4 (e), (f) and (g). All graphics are derived from the CC 2Na<sup>+</sup> simulation with two solvated sodium ions.

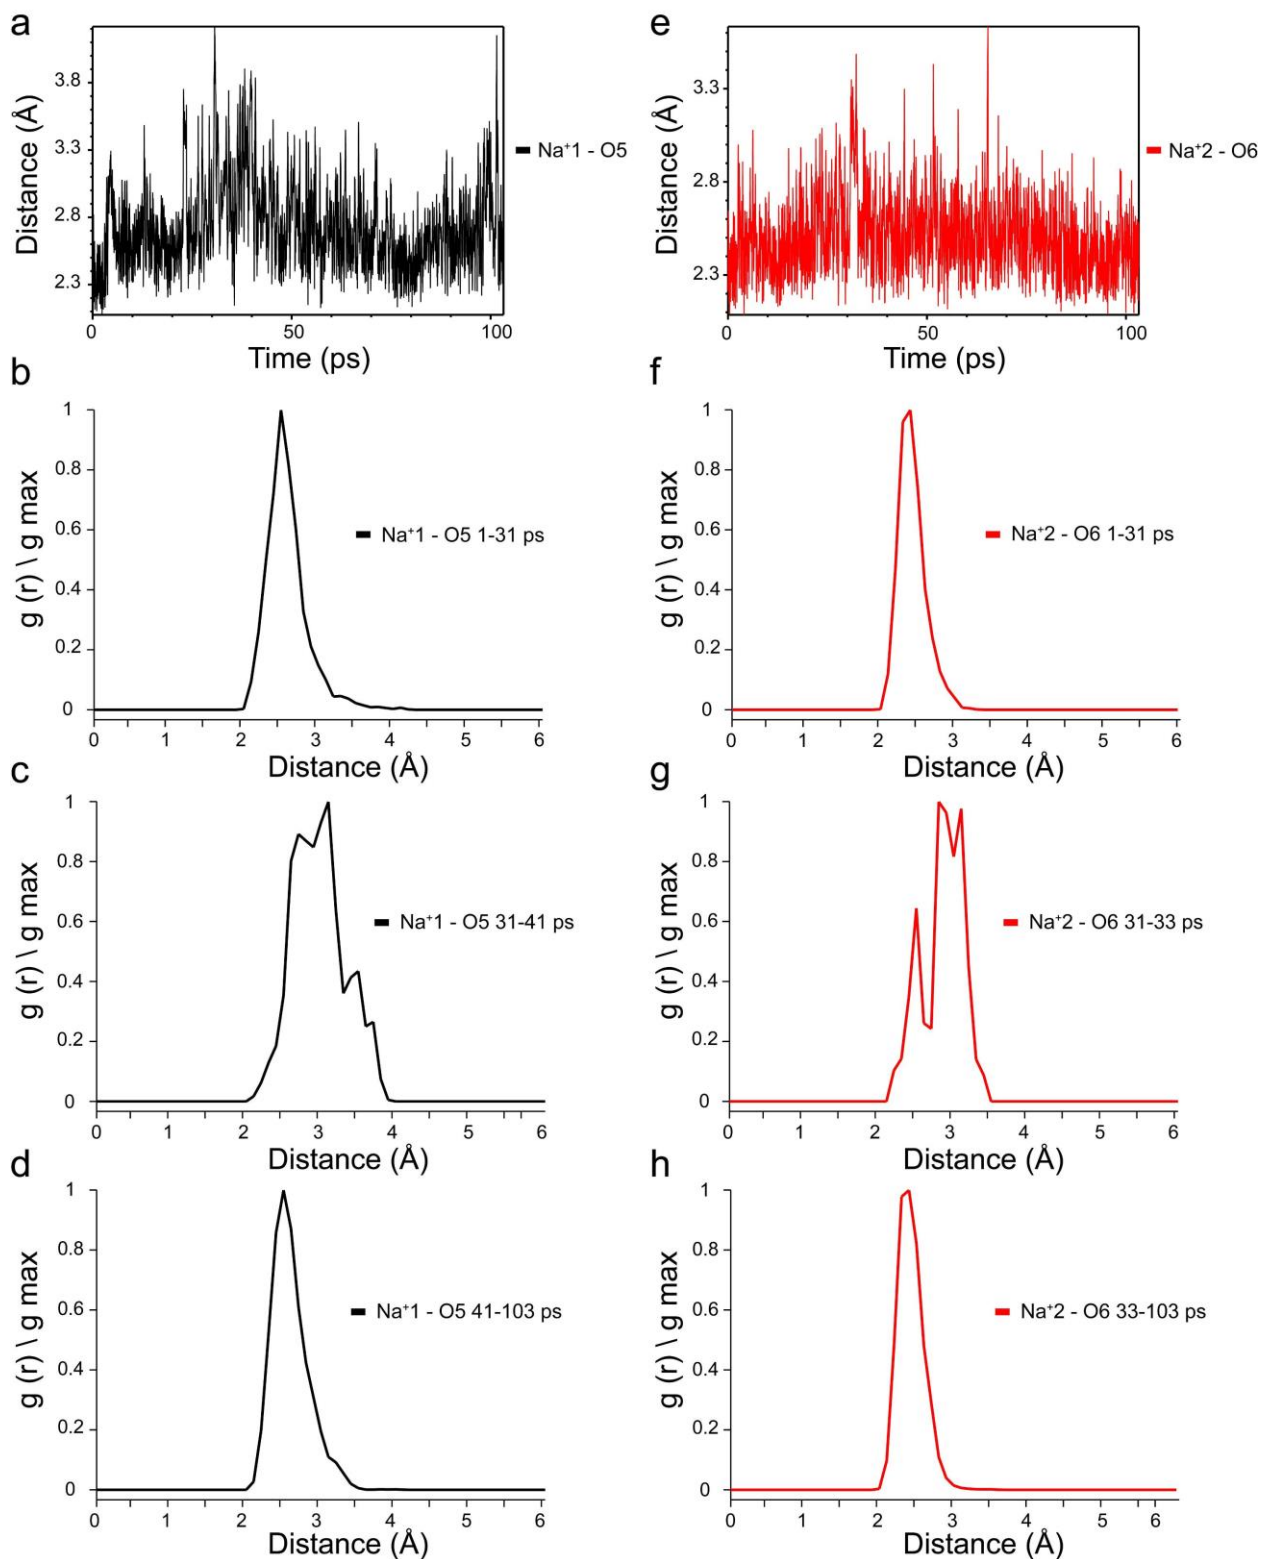

Figure S3. Dynamics of Na<sup>+</sup>1–O5 distance from the ion to the O atom of the PO<sub>4</sub> group (a); Na<sup>+</sup>2–O6 (e); RDFs for the corresponding distance Na<sup>+</sup>1–O5 (b), (c), (d); RDFs for the corresponding distance Na<sup>+</sup>2–O6 (f), (g), (h). All graphics are derived from the GC 2Na<sup>+</sup> simulation with two bound sodium ions.

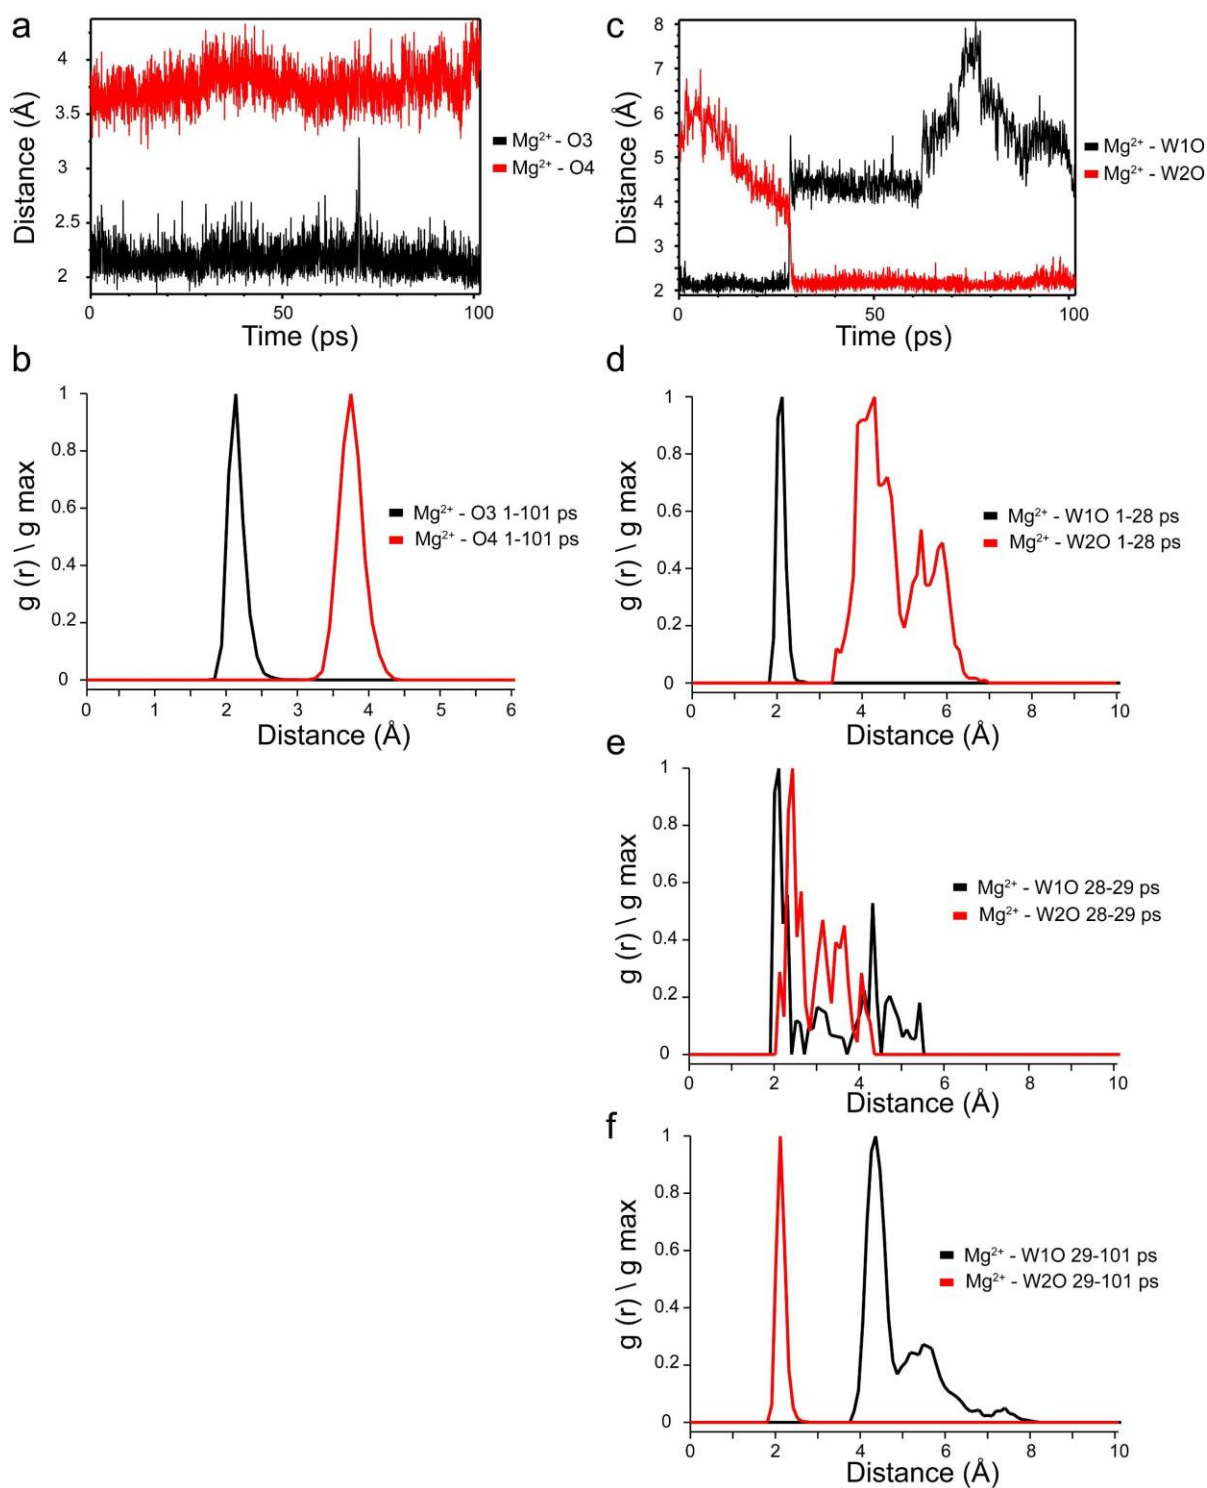

Figure S4. Dynamics of Mg<sup>2+</sup>-O3 and Mg<sup>2+</sup>-O4 distances from the ion to the O atom of the PO<sub>4</sub> group (a); Mg<sup>2+</sup>-W1O, Mg<sup>2+</sup>-W2O (c); RDFs for the corresponding distances Mg<sup>2+</sup>-O3 and Mg<sup>2+</sup>-O4 (b); RDFs for the corresponding distances Mg<sup>2+</sup>-W1O and Mg<sup>2+</sup>-W2O (d), (e) and (f). All graphics are derived from the CC Mg<sup>2+</sup> simulation with one bound magnesium ion.

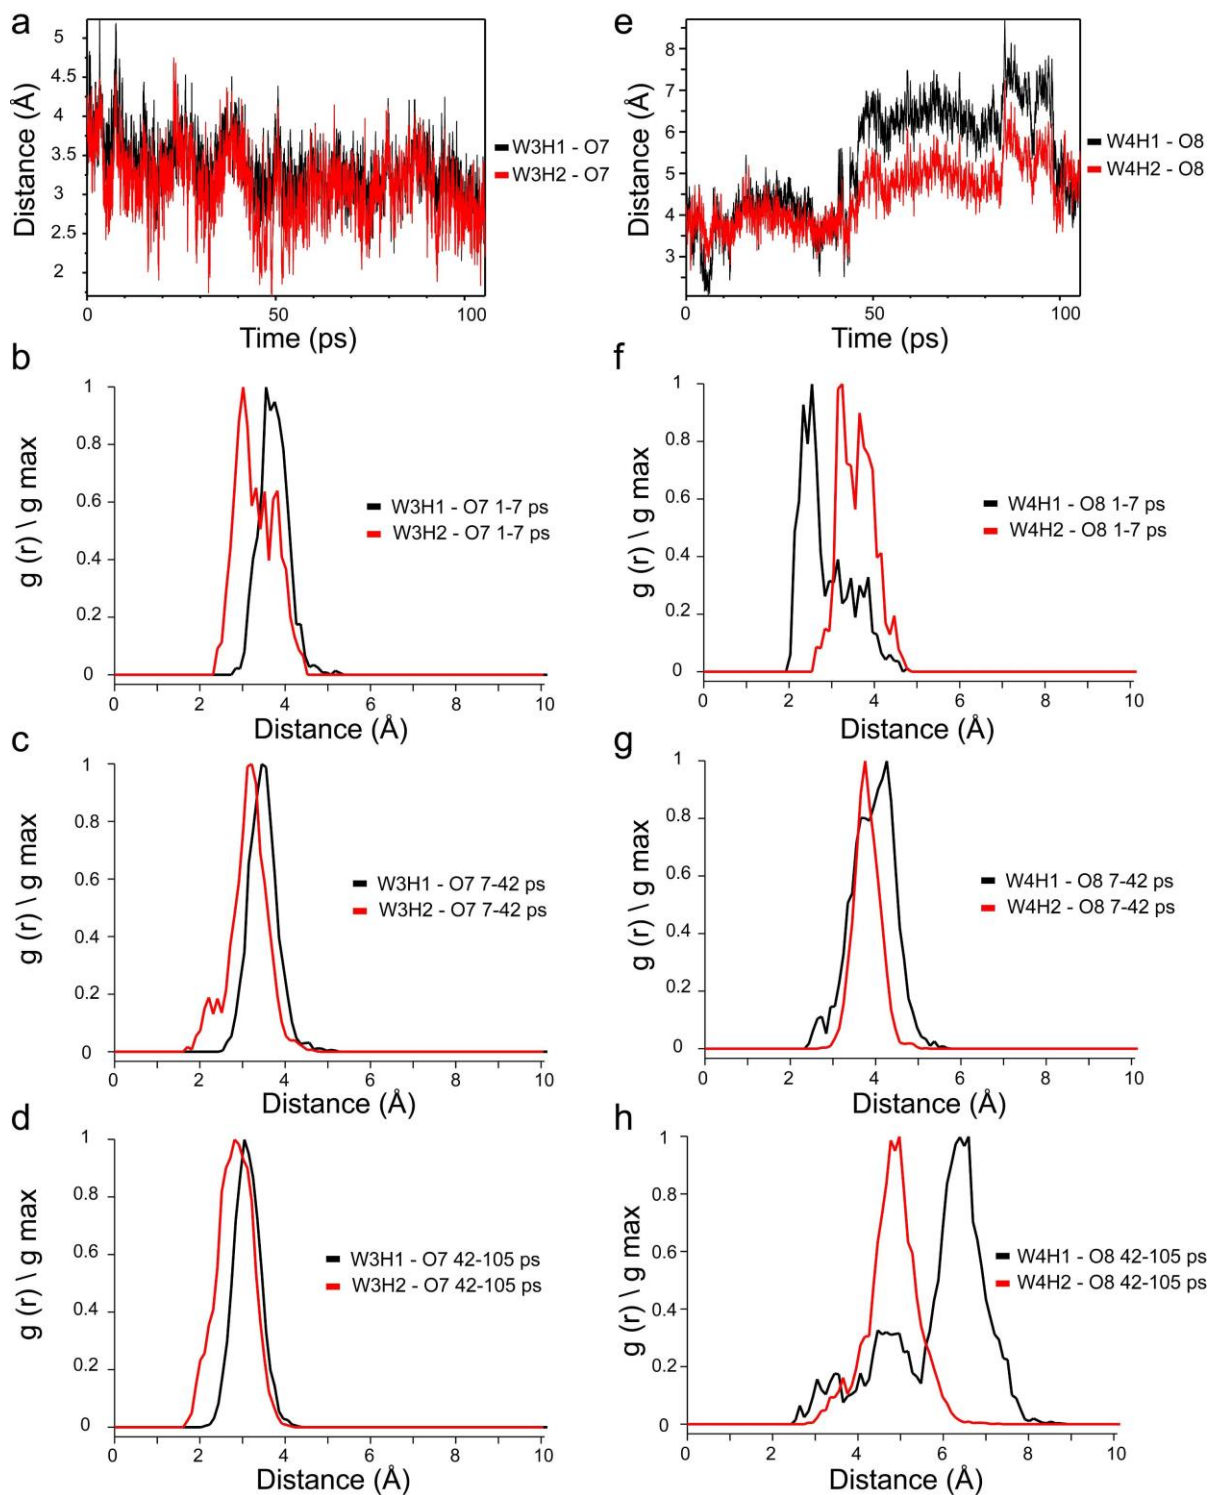

Figure S5. Dynamics of W3H1–O7 and W3H2–O7 distances from the H atom of the water molecule to the O atom of the PO<sub>4</sub> group (a); W4H1–O8 and W4H2–O8 (e); RDFs for the corresponding distances W3H1–O7 and W3H2–O7 (b), (c) (d); RDFs for the corresponding distances W4H1–O8 and W4H2–O8 (f), (g) and (h). All graphics are derived from the CC Mg<sup>2+</sup> simulation with one solvated magnesium ion.

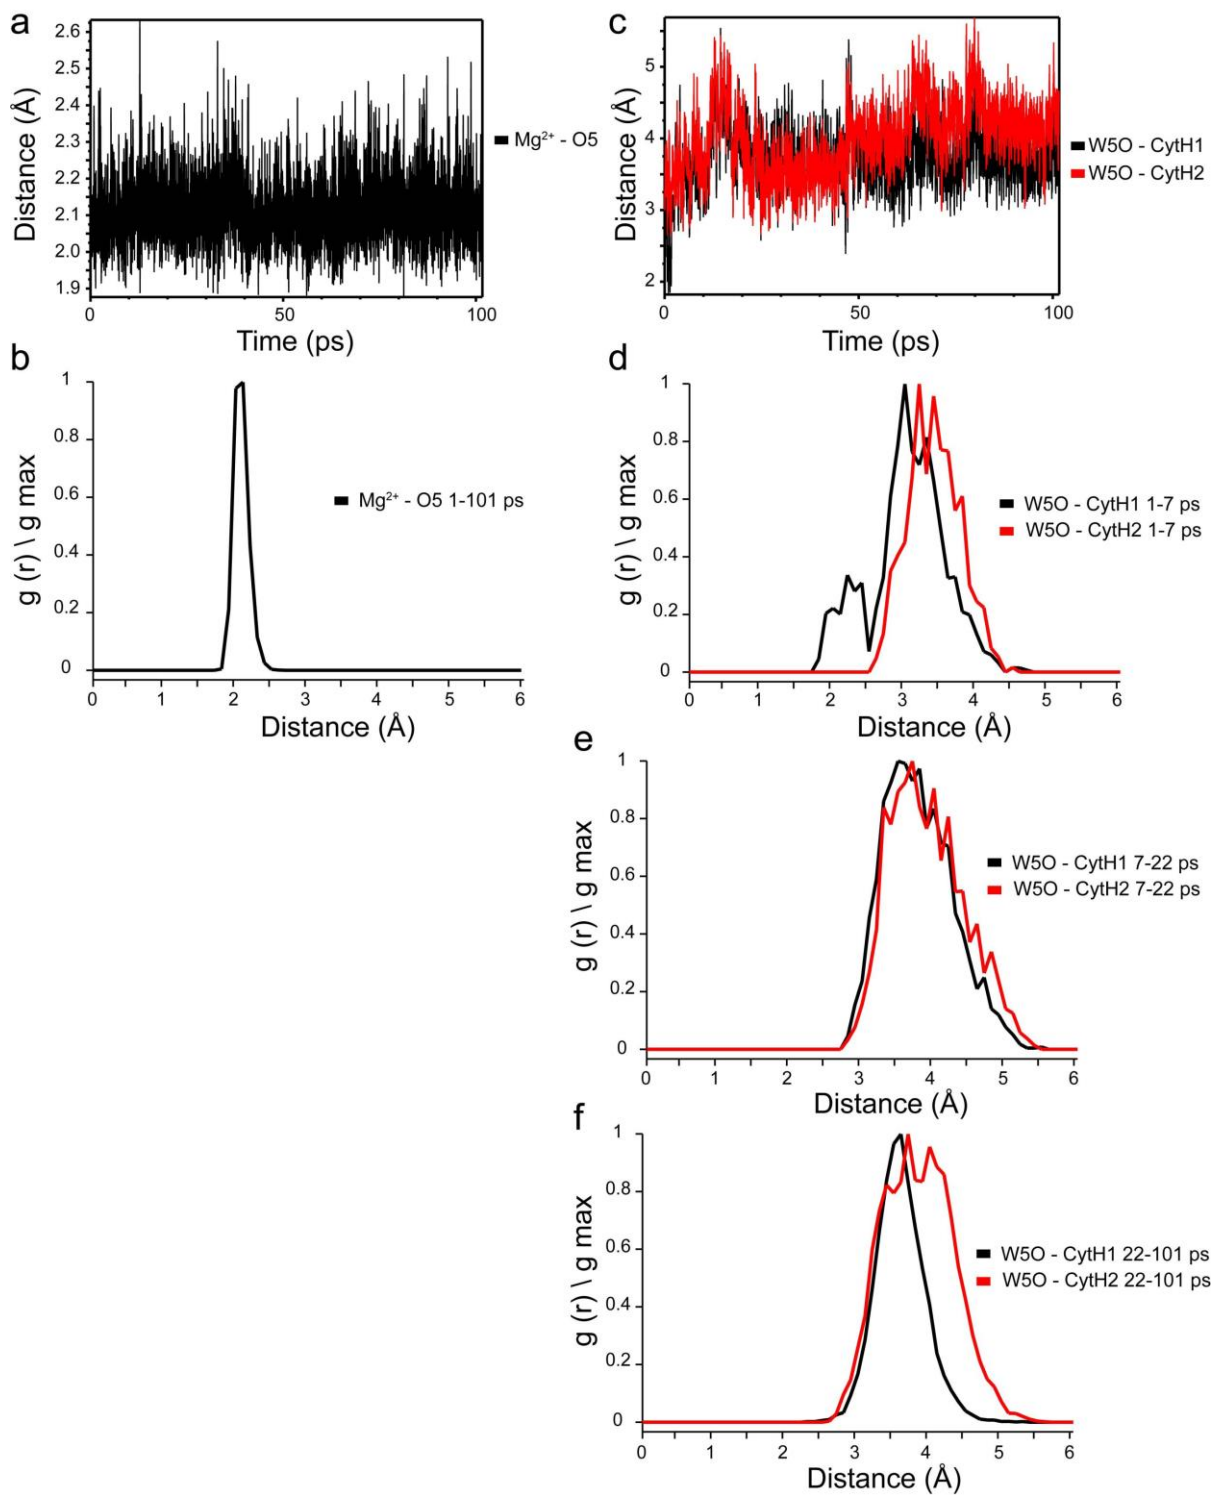

Figure S6. Dynamics of  $\text{Mg}^{2+}$ -O5 distance from the ion to the O atom of cytosine (see Figure 2) (a); W5O-CytH1 and W5O-CytH1, from water oxygen atom to the  $\text{NH}_2$  group of cytosine (c); RDFs for the corresponding distance  $\text{Mg}^{2+}$ -O5 (b); RDFs for the corresponding distances W5O-CytH1 and W5O-CytH1 (d), (e) and (f). All graphics are derived from the GC  $\text{Mg}^{2+}$  simulation with one bound magnesium ion.



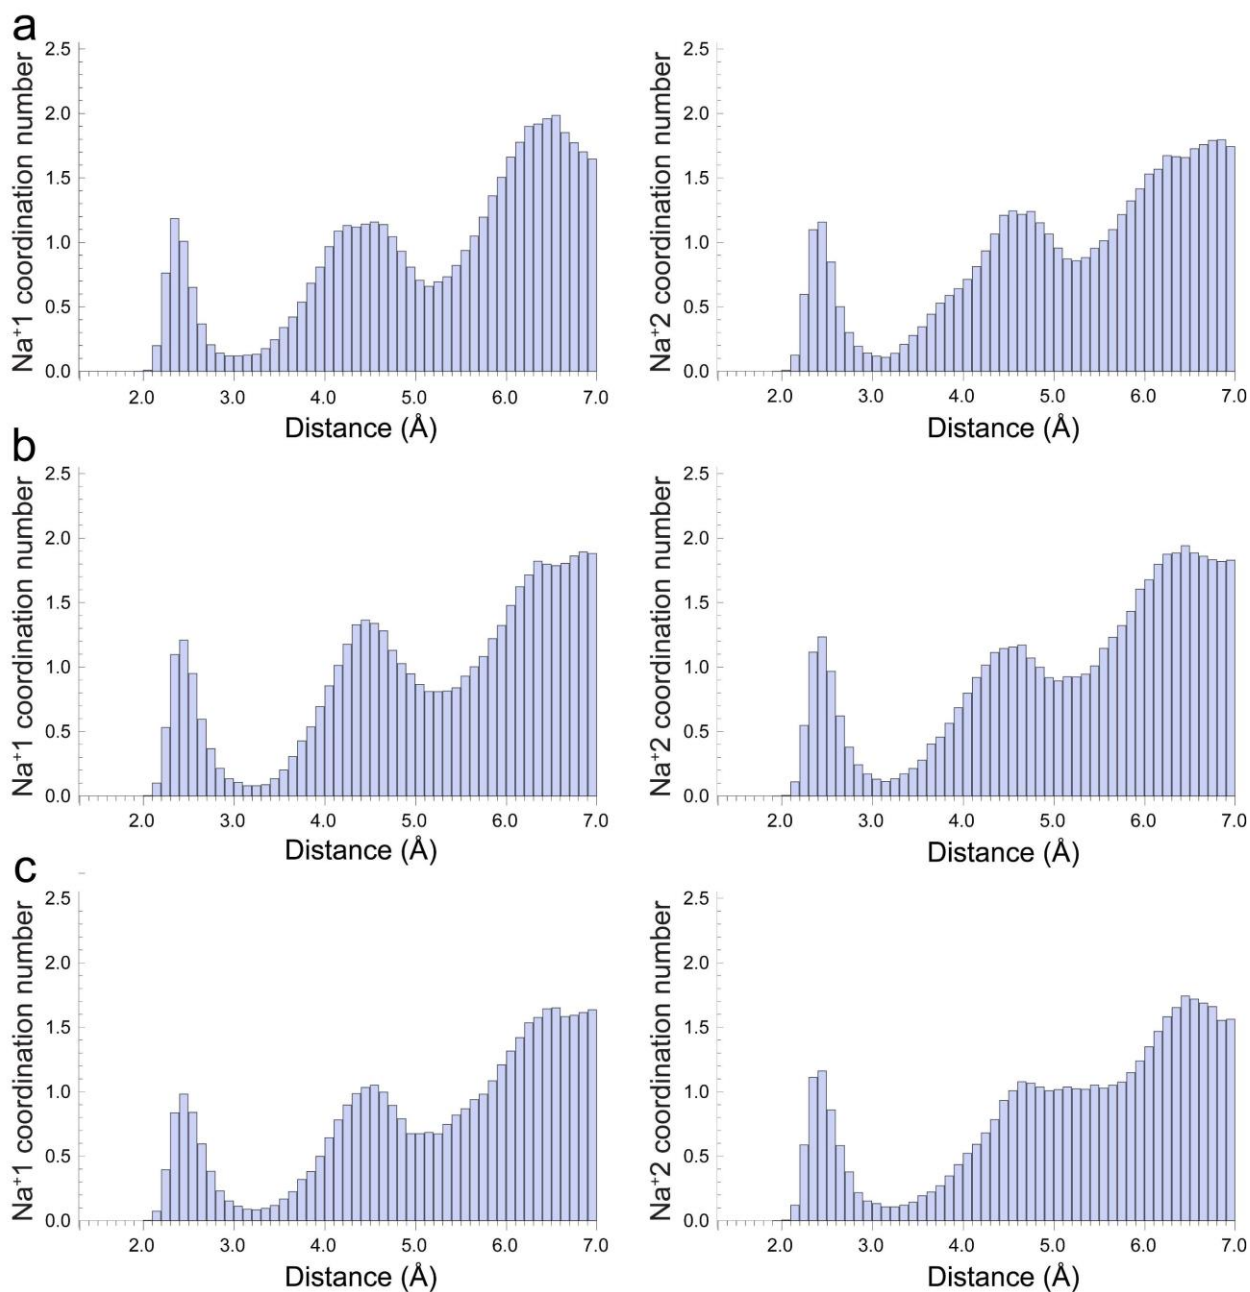

Figure S7: Histograms of the oxygen O atoms occurrence in the solvation shells of Na<sup>+1</sup> and Na<sup>+2</sup> ions in (a) CC 2Na<sup>+</sup> simulation with two bound sodium ions, (b) CC 2Na<sup>+</sup> simulation with two solvated sodium ions, and (c) GC 2Na<sup>+</sup> simulation with two bound sodium ions.

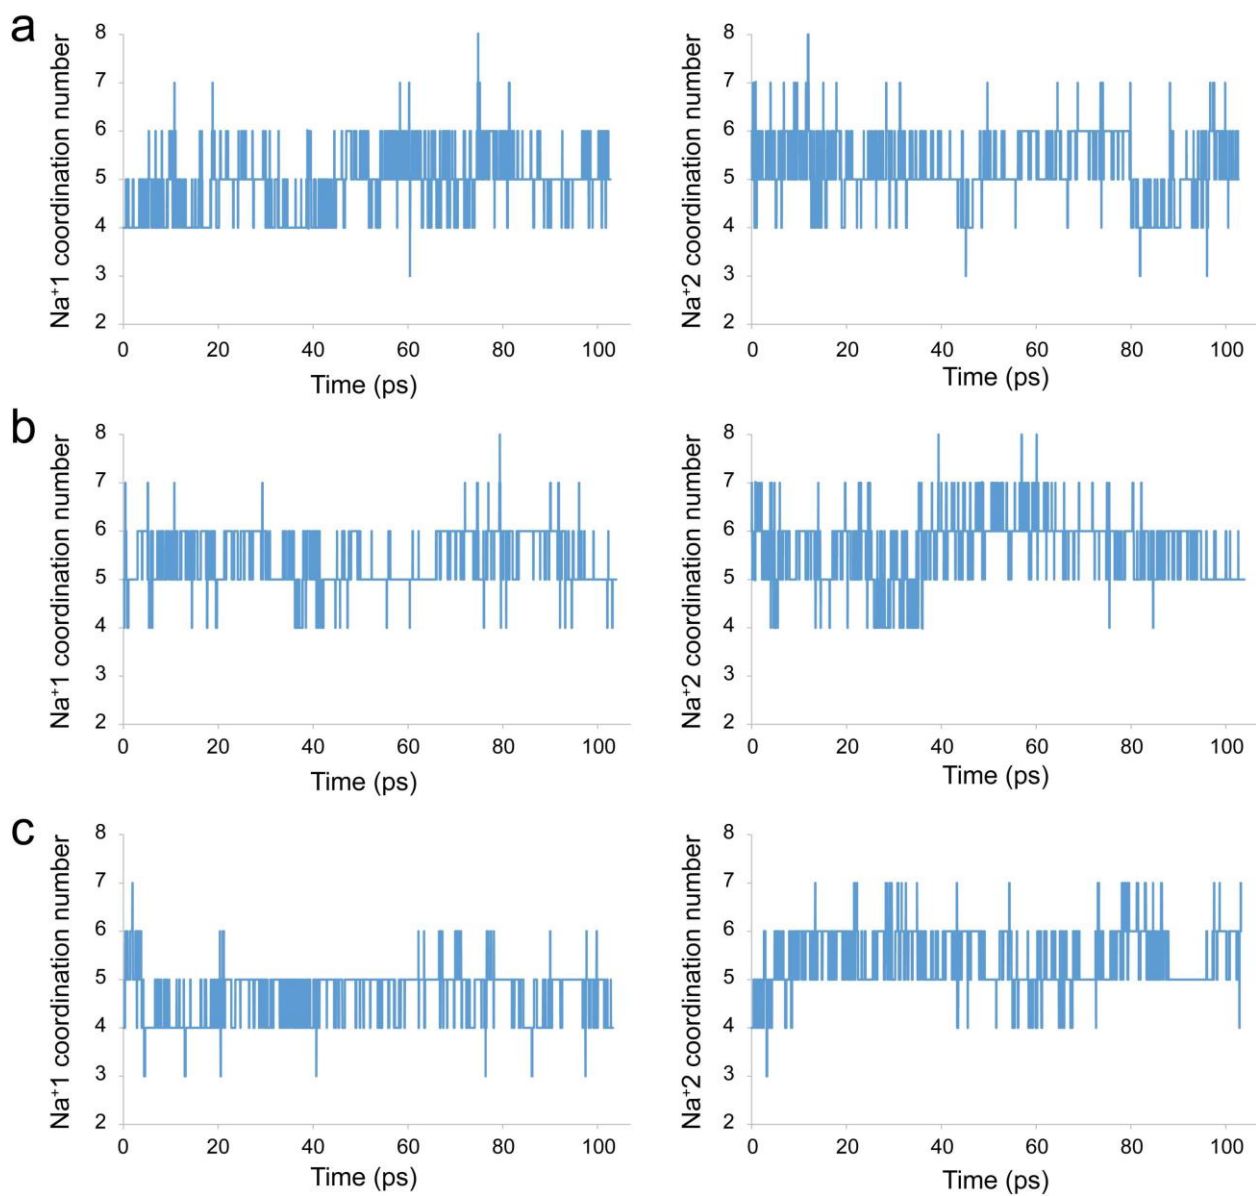

Figure S8. Dynamics of  $\text{Na}^+1$  and  $\text{Na}^+2$  coordination numbers with cut-off radius  $r = 3:2 \text{ \AA}$  in (a) CC  $2\text{Na}^+$  simulation with two bound sodium ions; (b) CC  $2\text{Na}^+$  simulation with two solvated sodium ions; and (c) GC  $2\text{Na}^+$  simulation with two bound sodium ions.

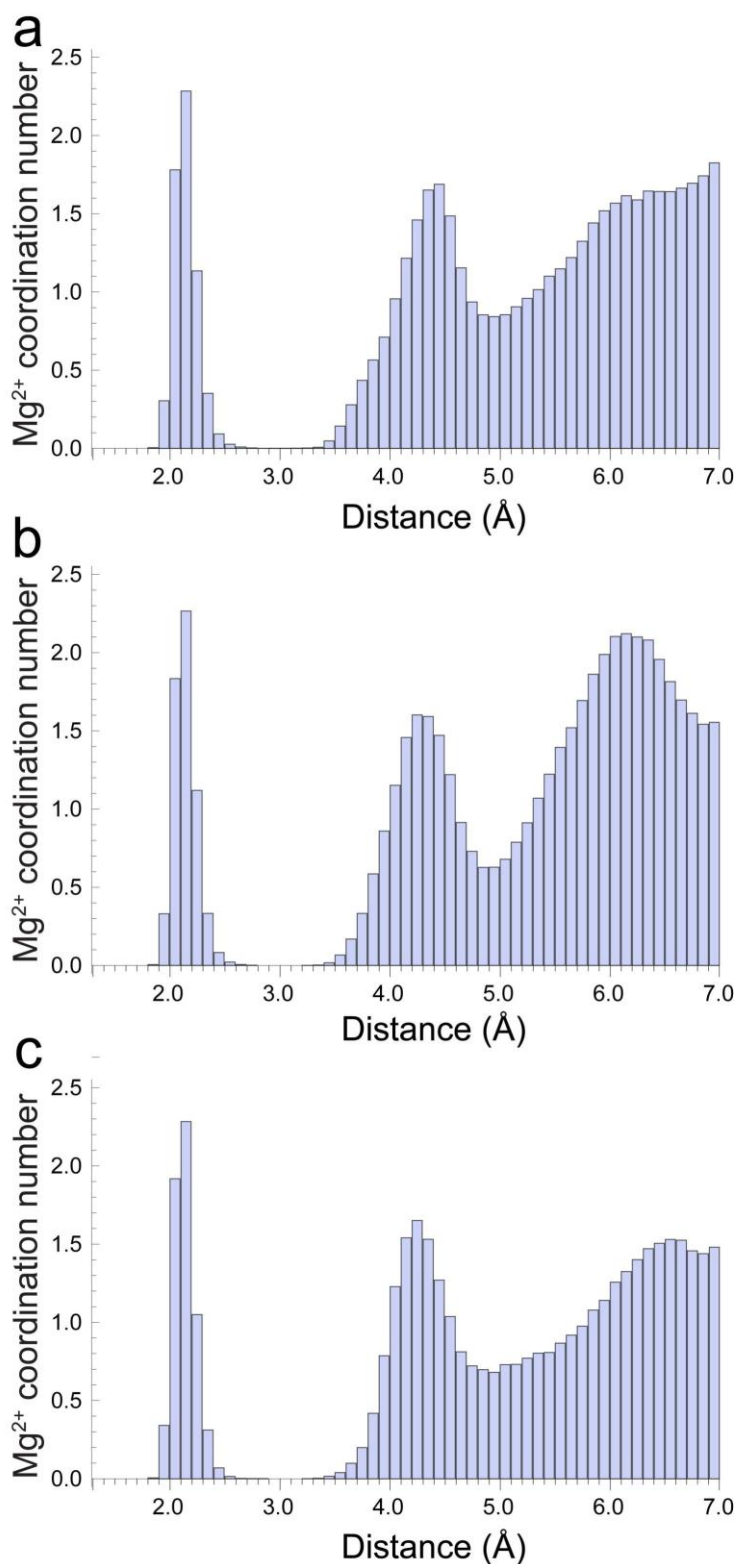

Figure S9. Histograms of the oxygen O atoms occurrence in the solvation shell of Mg<sup>2+</sup> ion in (a) CC Mg<sup>2+</sup> simulation with one bound magnesium ion; (b) CC Mg<sup>2+</sup> simulation with one solvated magnesium ion; and (c) GC Mg<sup>2+</sup> simulation with one bound magnesium ion.

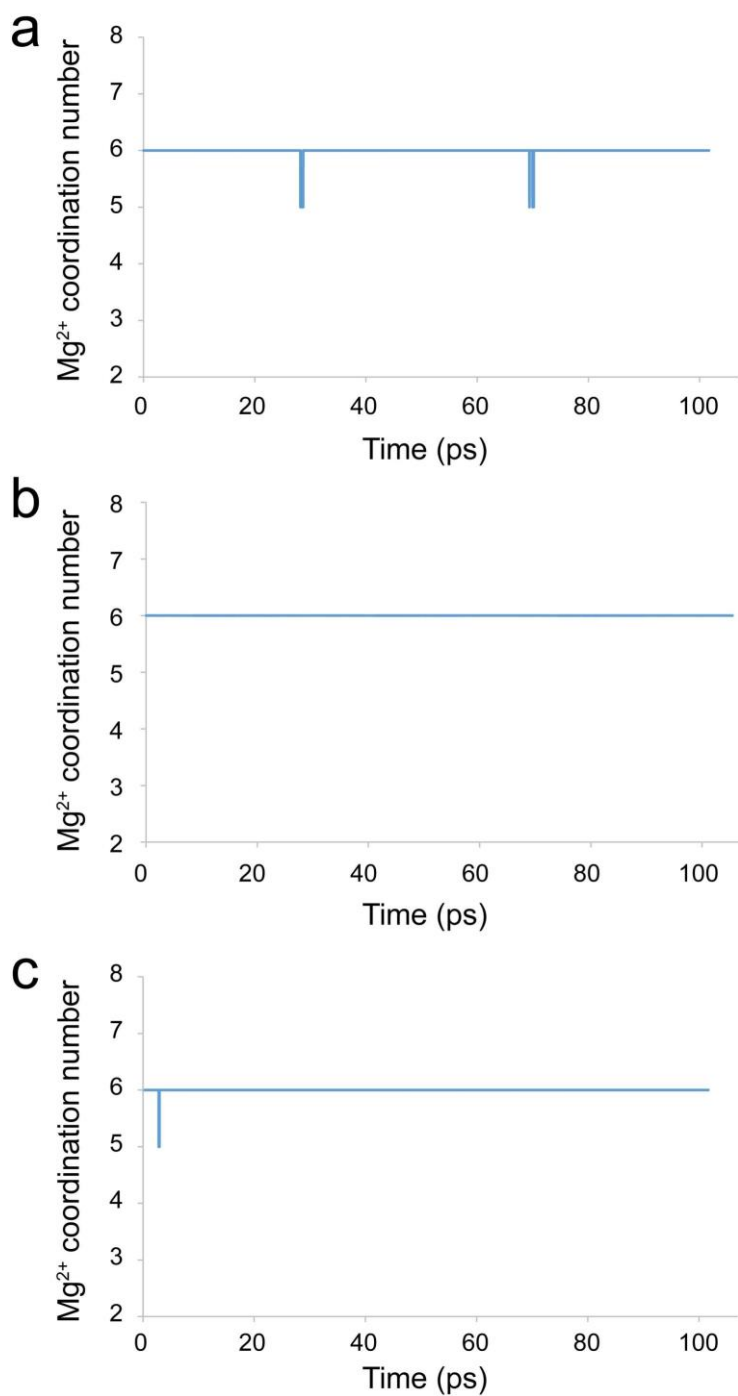

Figure S10. Dynamics of Mg<sup>2+</sup> coordination number with cut-off radius  $r = 2.8 \text{ \AA}$  in (a) CC Mg<sup>2+</sup> simulation with one bound magnesium ion; (b) CC Mg<sup>2+</sup> simulation with one solvated magnesium ion; and (c) GC Mg<sup>2+</sup> simulation with one bound magnesium ion.

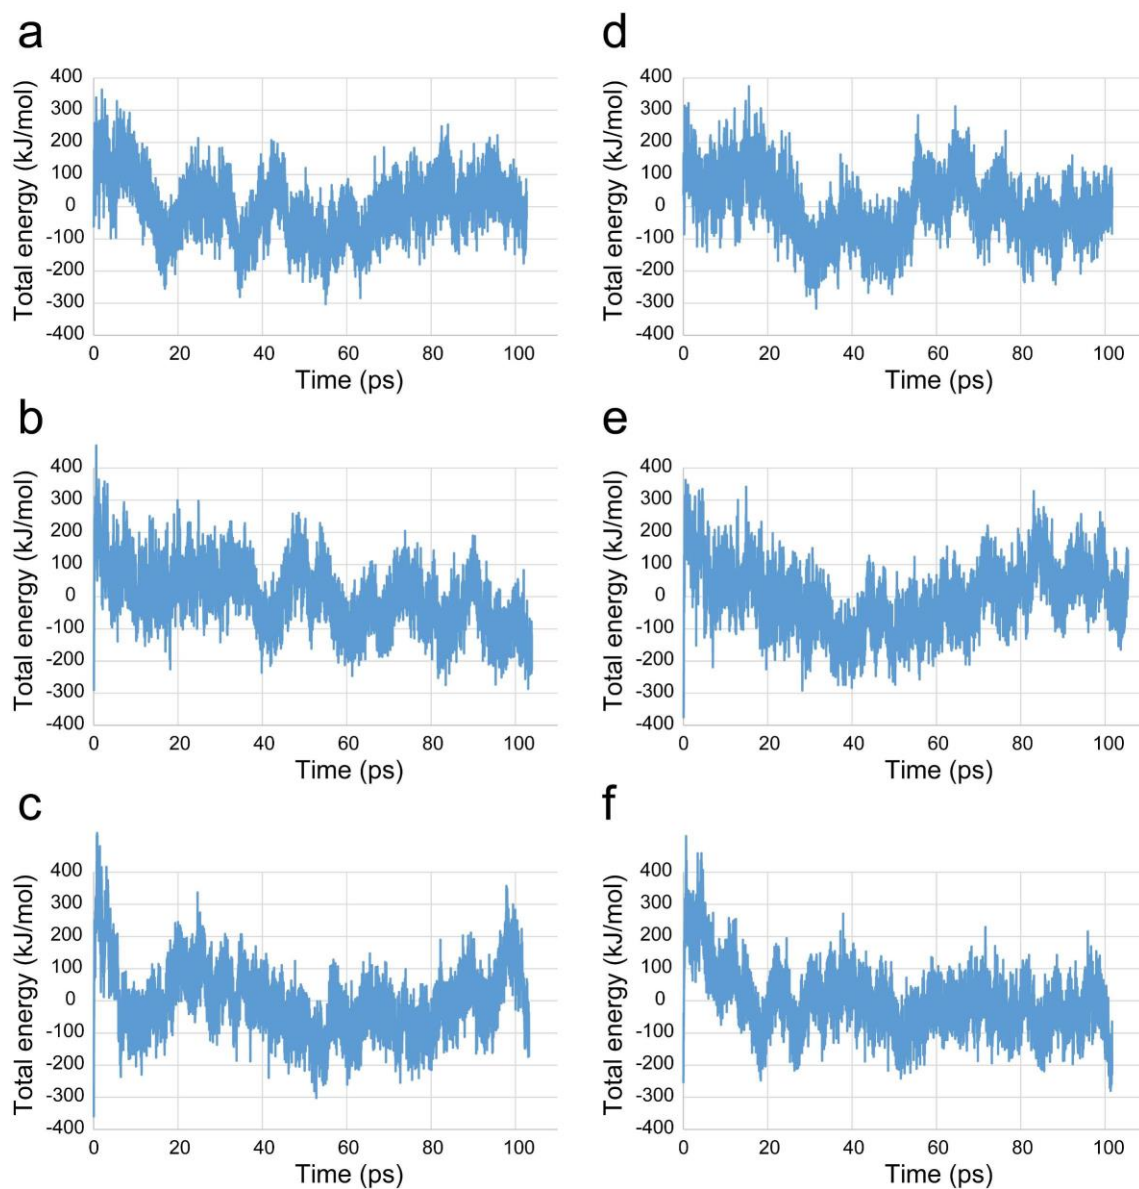

Figure S11. Dynamics of total energy of the system fluctuating around the total energy expectation value  $\langle E \rangle$  (set to zero in the plots) in (a) CC  $2\text{Na}^+$  simulation with two bound sodium ions; (b) CC  $2\text{Na}^+$  simulation with two solvated sodium ions; (c) GC  $2\text{Na}^+$  simulation with two bound sodium ions; (d) CC  $\text{Mg}^{2+}$  simulation with one bound magnesium ion; (e) CC  $\text{Mg}^{2+}$  simulation with one solvated magnesium ion; and (f) GC  $\text{Mg}^{2+}$  simulation with one bound magnesium ion.
